# Supplementary material for: Non-targeted metabolite profiling of citrus juices as a tool for variety discrimination and metabolite flow analysis
Source: PubMed Central journal article supplement (PMC4329192; doi:10.1186/s12870-015-0430-8), 2015-02-05
Supplement: 12870_2015_430_MOESM1_ESM.pdf [file 12870_2015_430_MOESM1_ESM.pdf]

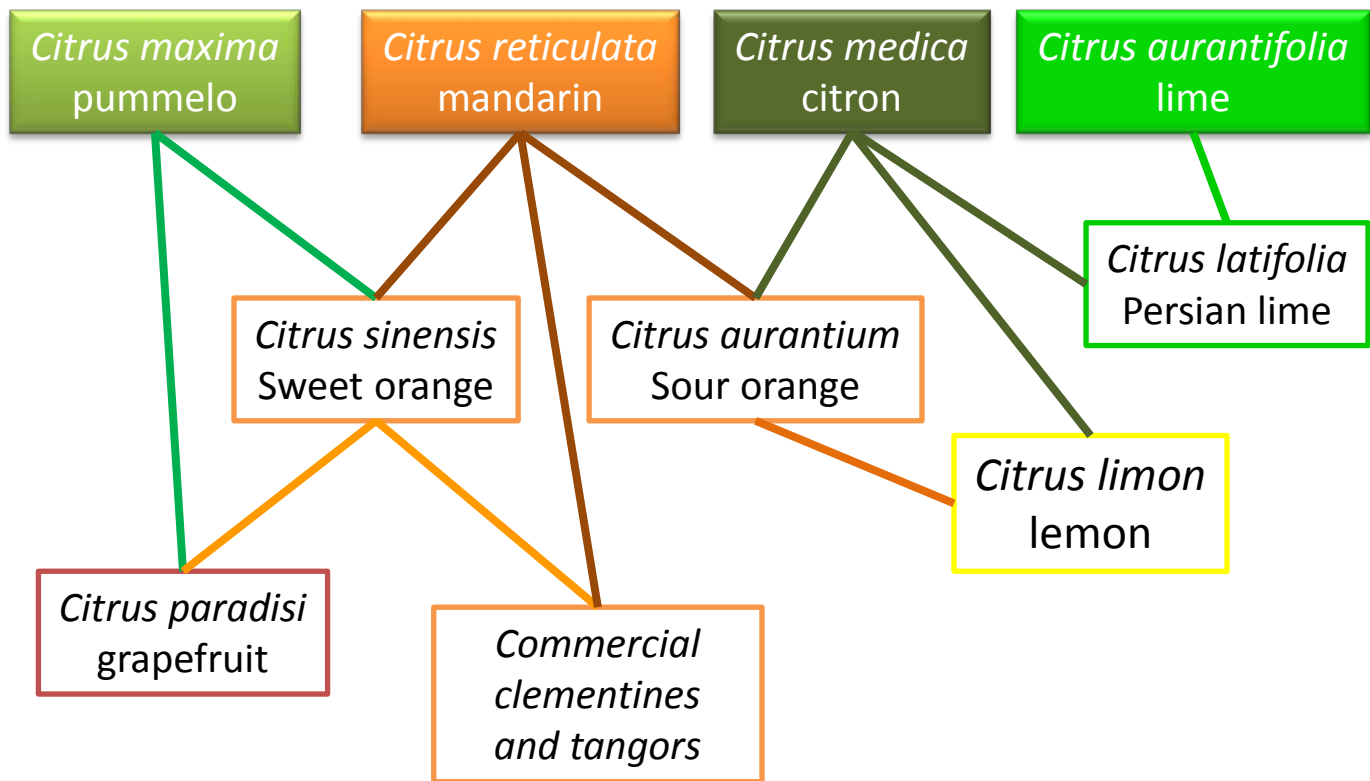

**Supplementary Figure 1.** Phylogenetic tree depicting relationships between all known parental ancestor lines and commercial genotypes.
